# Supplementary material for: Microbial degradation of bioplastic (PHBV) is limited by nutrient availability at high microplastic loadings
Source: Royal Society of Chemistry journal article supplement (doi:10.1039/d4va00311j), 2024-10-29
Supplement: d4va00311j1.pdf [file d4va00311j1.pdf]

## Supplementary Information

### Microbial degradation of bioplastic (PHBV) is limited by nutrient availability at high microplastic loadings

Michaela K. Reay<sup>a,1\*</sup>, Martine Graf<sup>b,1</sup>, Lucy M. Greenfield<sup>b</sup>, Rafael Bargiela<sup>c</sup>, Charles Onyije<sup>a</sup>, Charlotte E.M. Lloyd<sup>a,d</sup>, Ian D. Bull<sup>a</sup>, Richard P. Evershed<sup>a</sup>, Peter N. Golyshin<sup>c</sup>, David R. Chadwick<sup>a</sup> and Davey L. Jones<sup>b</sup>

<sup>a</sup> *Organic Geochemistry Unit, School of Chemistry, University of Bristol, Bristol, BS8 1TS, UK*

<sup>b</sup> *School of Environmental and Natural Sciences, Bangor University, Bangor, Gwynedd, LL57 2UW, UK*

<sup>c</sup> *Centre for Environmental Biotechnology, Bangor University, Bangor, Gwynedd, LL57 2UW, UK*

<sup>d</sup> *School of Geography, University of Bristol, Bristol, BS8 1TS, UK*

<sup>1</sup> These authors have contributed equally to this work.

\*Corresponding author: Michaela K. Reay, [michaela.reay@bristol.ac.uk](mailto:michaela.reay@bristol.ac.uk)

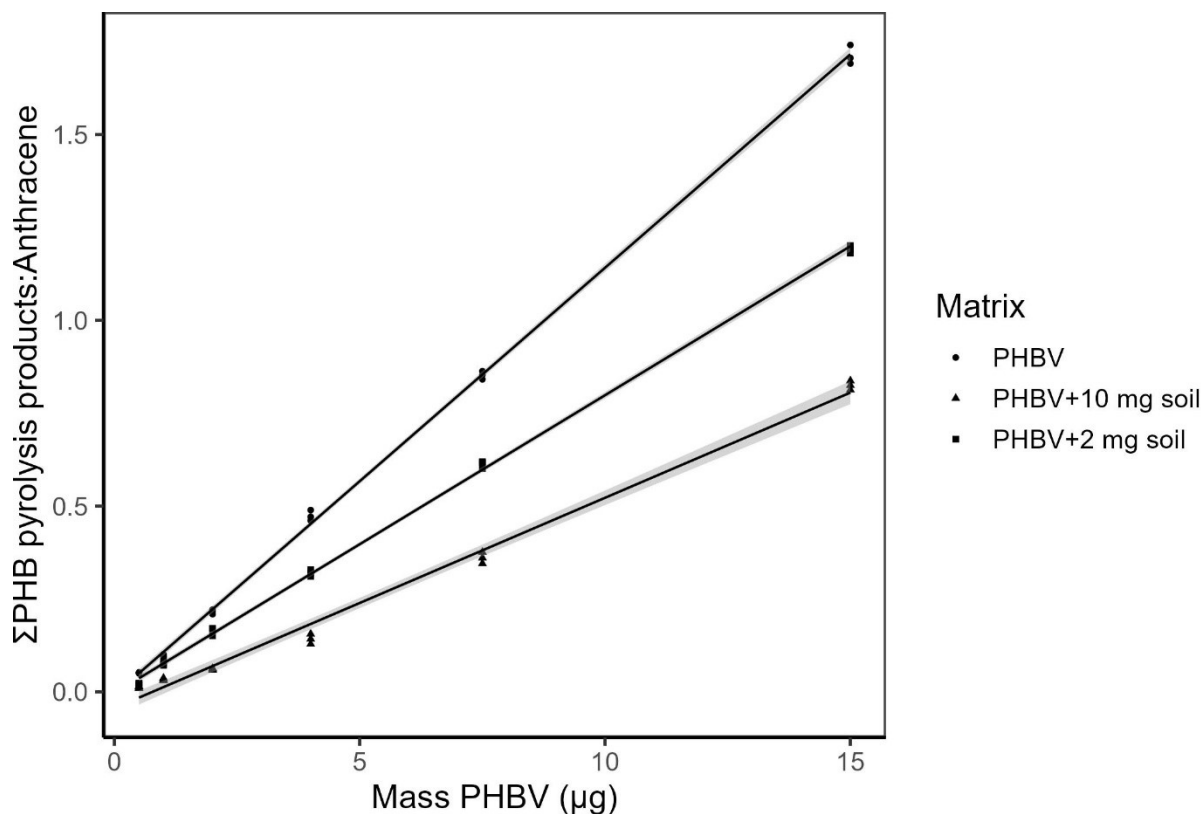

**Figure S1:** Effect of increasing soil mass (0, 2 and 10 mg) on the pyrolysis response of PHBV, based on the sum of PHB pyrolysis products methyl-3-butenate, *cis*-methyl-2-butenate and *trans*-methyl-2-butenate, relative to the internal standard, anthracene- $d_{10}$ , added to normalise for any differences between pyrolysis runs. Each concentration/soil mass combination were analysed in triplicate. The solid black line is the linear regression, and the grey shading represents the 95% confidence interval. The  $r^2$  for the linear regressions are 0.9983, 0.9981 and 0.9916 for 0 mg, 2 mg and 10 mg of soil, respectively.

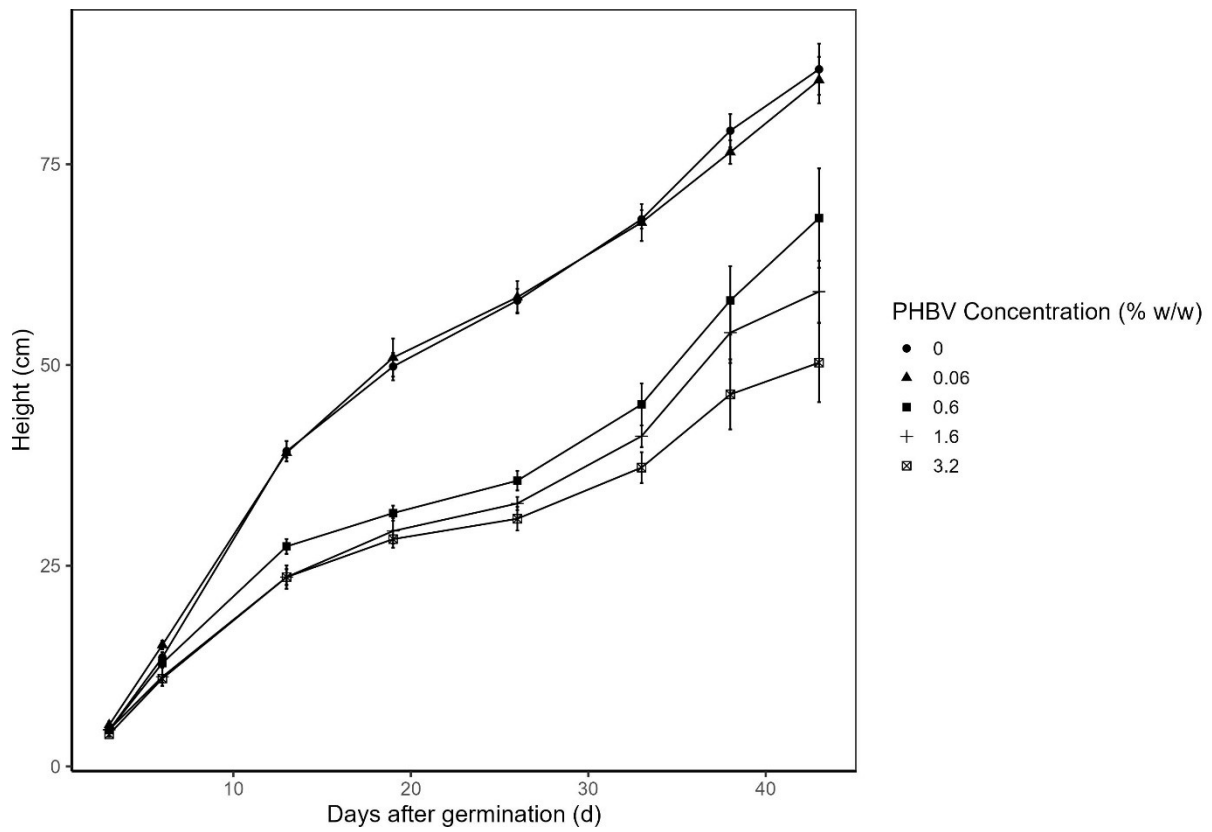

**Figure S2:** Height of maize plants following germination in response to exposure to varying PHBV microplastic concentrations. Values represent mean  $\pm$  S.E. ( $n = 5$ ).

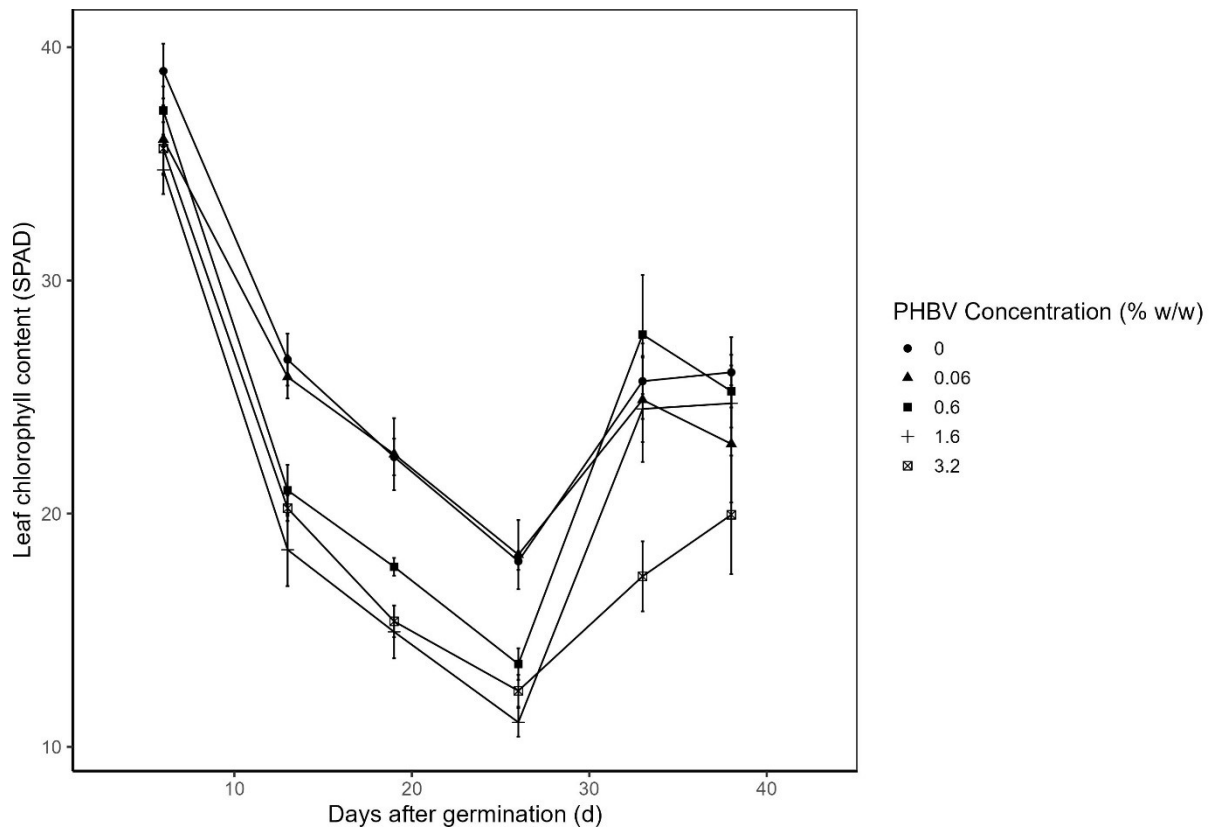

**Figure S3:** Chlorophyll content (SPAD) of maize leaves following germination in response to exposure to varying PHBV microplastic concentrations. Values represent mean  $\pm$  S.E. ( $n = 5$ ).

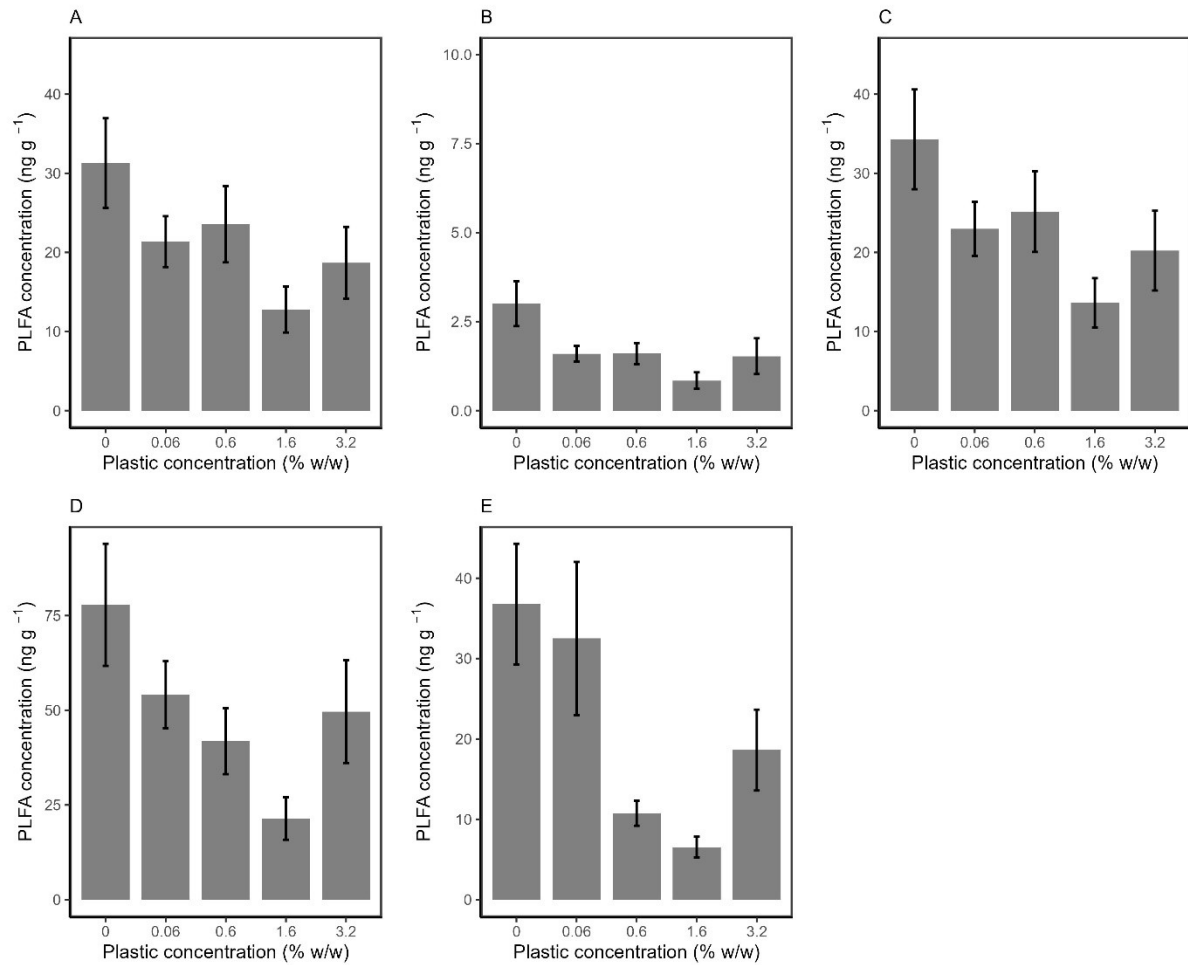

**Figure S4:** Concentrations of PLFAs in soil attributed to firmicute bacteria (A), actinobacteria (B), total Gram+ bacteria (firmicutes and actinobacteria) (C), Gram- (D) and fungi (E) in response to exposure to varying PHBV microplastic concentrations after 8 weeks. Concentrations were corrected for varying contribution of PHBV in soil. Values represent mean  $\pm$  SE ( $n = 5$ ). Note differing scales for clarity.

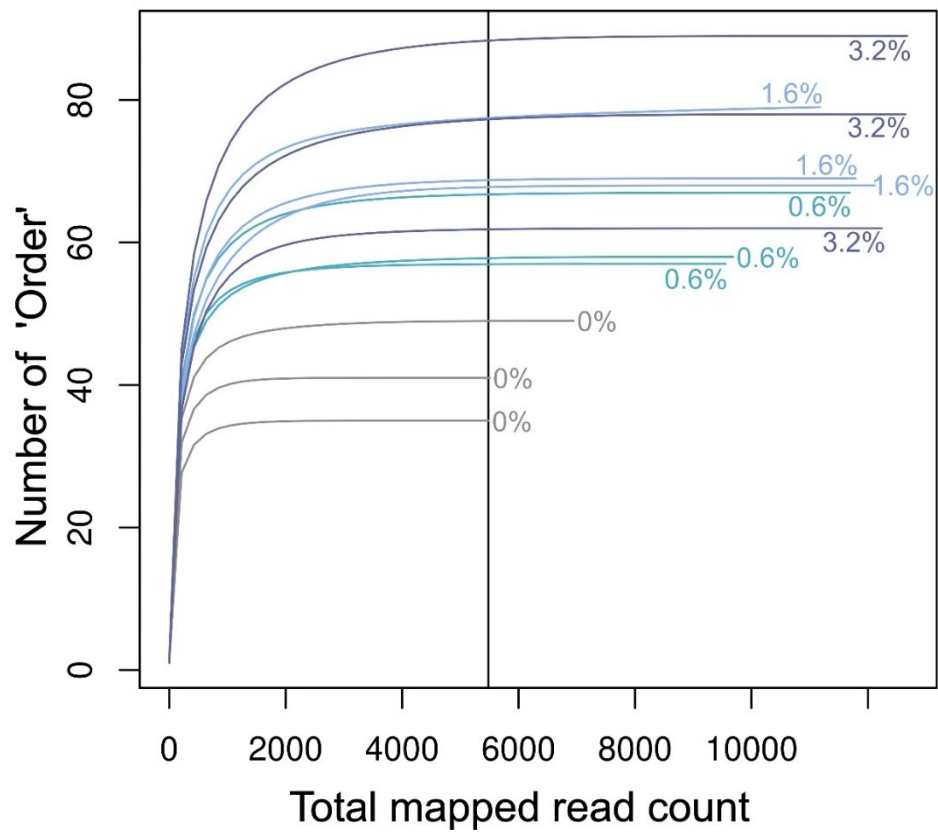

**Figure S5:** Rarefaction curve with normalised data, demonstrating the minimum required total mapped read count for sufficient sample coverage against taxonomic level 'order'. Each curve represents a replicate for each of the PHBV concentrations in soil (% w/w).

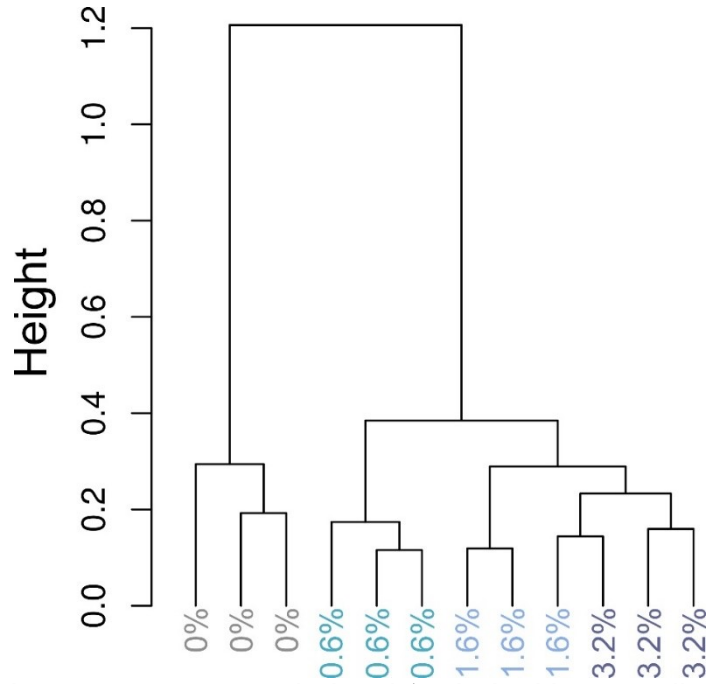

**Figure S6:** Dendrogram at taxonomic level 'order' with normalised data, clustering samples according to bray distance and ward criterion. The results are replicates for each of the PHBV concentrations in soil (% w/w).

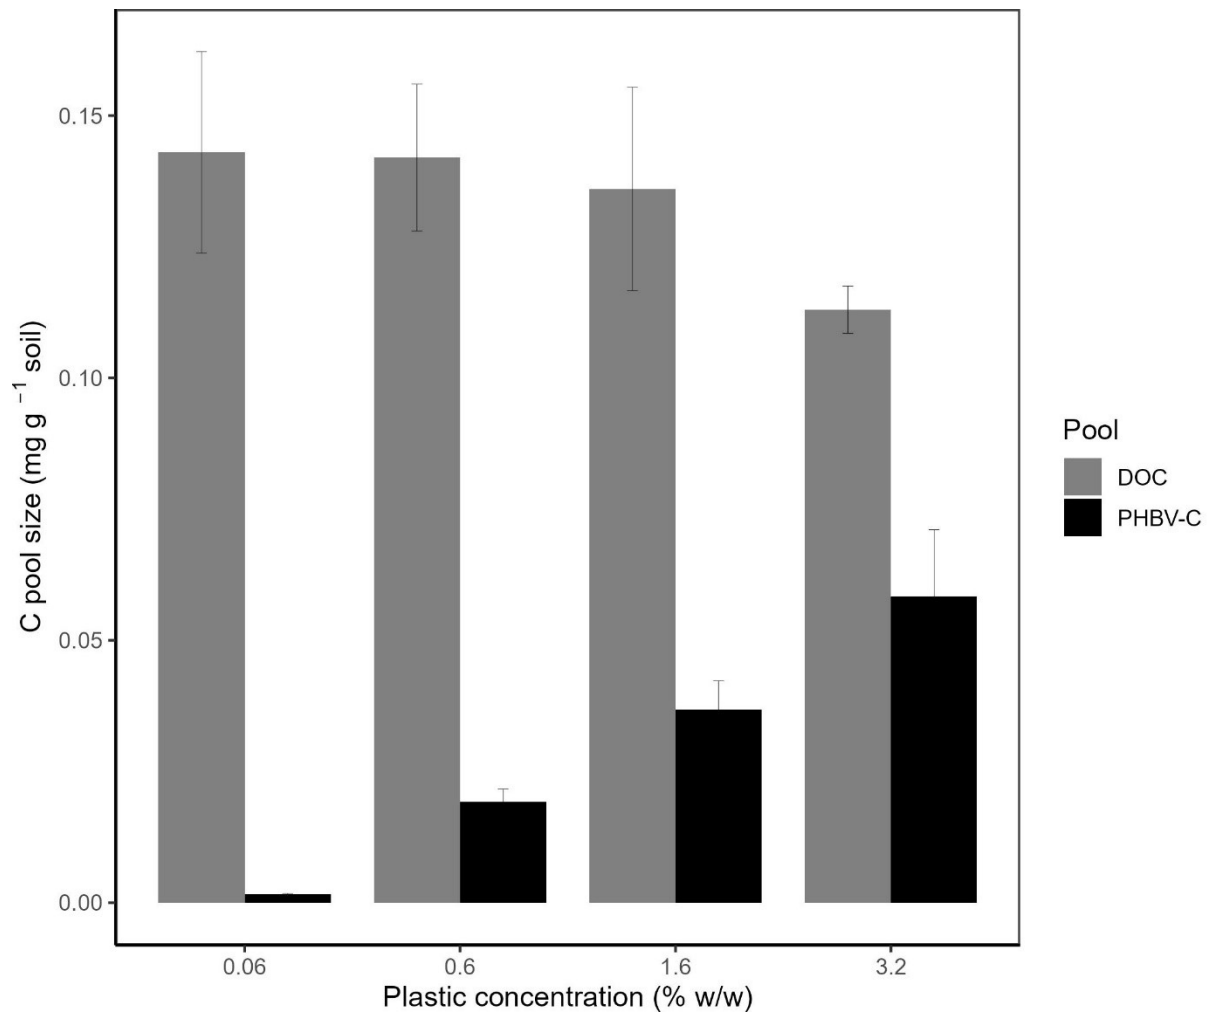

**Figure S7:** Comparison of soil dissolved oxidisable C (DOC) and PHBV-derived C released during degradation across the 8-week experimental period. Values are mean  $\pm$  SE ( $n = 5$ ).



**Table S1:** Properties of the soil used to establish the plant-soil mesocosm. All values are mean  $\pm$  SE ( $n = 3$ ). Soil was also used in Graf et al. (2023).

| <b>Soil property</b>                                | <b>Mean <math>\pm</math> SE</b> |
|-----------------------------------------------------|---------------------------------|
| pH                                                  | 6.1 $\pm$ 0.1                   |
| EC<br>( $\mu\text{S cm}^{-1}$ )                     | 120 $\pm$ 4                     |
| Clay<br>(%)                                         | 42.3 $\pm$ 0.9                  |
| Silt<br>(%)                                         | 42.3 $\pm$ 0.3                  |
| Sand<br>(%)                                         | 15.3 $\pm$ 0.9                  |
| Extractable ammonium<br>( $\text{mg N kg}^{-1}$ )*  | 2.5 $\pm$ 0.5                   |
| Extractable nitrate<br>( $\text{mg N kg}^{-1}$ )*   | 12.4 $\pm$ 2.7                  |
| Available phosphate<br>( $\text{mg P kg}^{-1}$ )*   | 41.5 $\pm$ 0.6                  |
| Extractable potassium<br>( $\text{mg K kg}^{-1}$ )* | 165.3 $\pm$ 4.3                 |

*EC, electrical conductivity. \*data expressed on a dry weight basis.*
